# Supplementary material for: Electrodeposition of sulfur-engineered amorphous nickel hydroxides on MIL-53(Fe) nanosheets to accelerate the oxygen evolution reaction
Source: Royal Society of Chemistry journal article supplement (doi:10.1039/c9nr03430g), 2019-01-01
Supplement: c9nr03430g1.pdf [file c9nr03430g1.pdf]

## Supporting Information

### **Electrodeposition of sulfur-engineered amorphous nickel hydroxides on MIL-53(Fe) nanosheets to accelerate the Oxygen Evolution Reaction**

Fang Wu,<sup>‡</sup> Xiaoxue Guo,<sup>‡</sup> Gazi Hao, Yubing Hu\* and Wei Jiang\*

School of Chemical Engineering, Nanjing University of Science and Technology, Nanjing 210094, China.

E-mail: [superfine\\_jw@126.com](mailto:superfine_jw@126.com), [hyb@njust.edu.cn](mailto:hyb@njust.edu.cn)

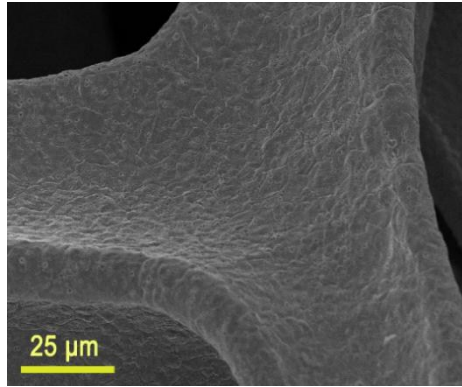

**Figure S1.** The SEM image of Ni foam.

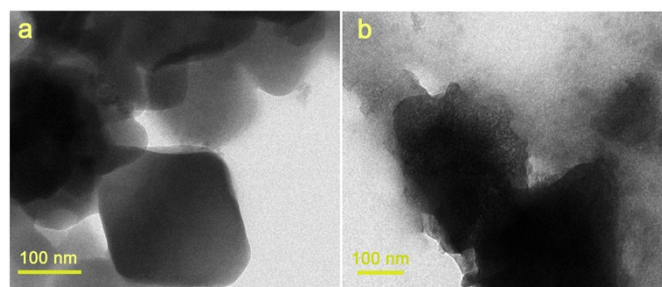

**Figure S2.** TEM spectra of (a) MIL-53(Fe) and (b) Ni/MIL-53(Fe).

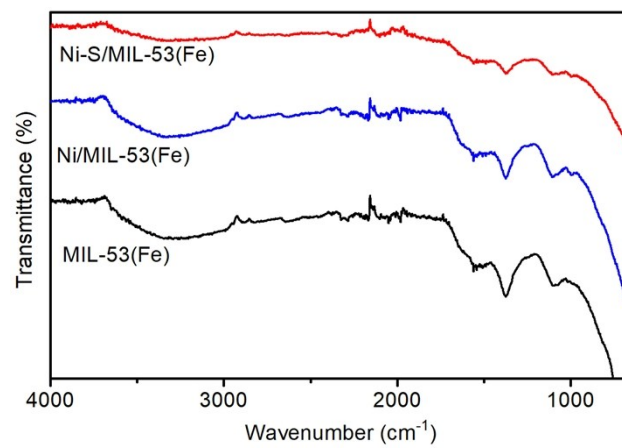

**Figure S3.** FT-IR spectrums of MIL-53(Fe), Ni-S/MIL-53(Fe) and Ni/MIL-53(Fe).

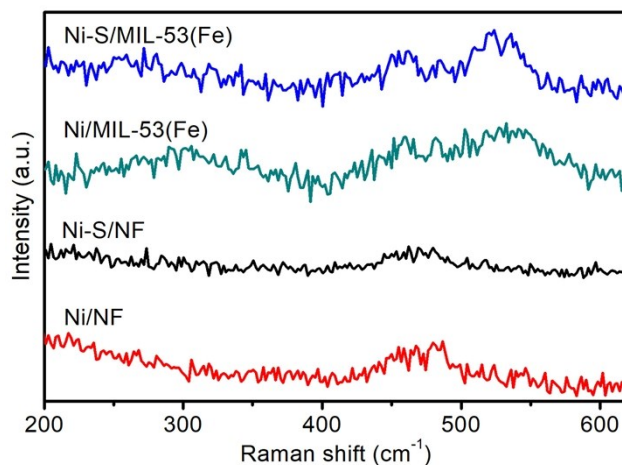

**Figure S4.** Raman spectrums of Ni/NF, Ni-S/NF, Ni/MIL-53(Fe) and Ni-S/MIL-53(Fe).

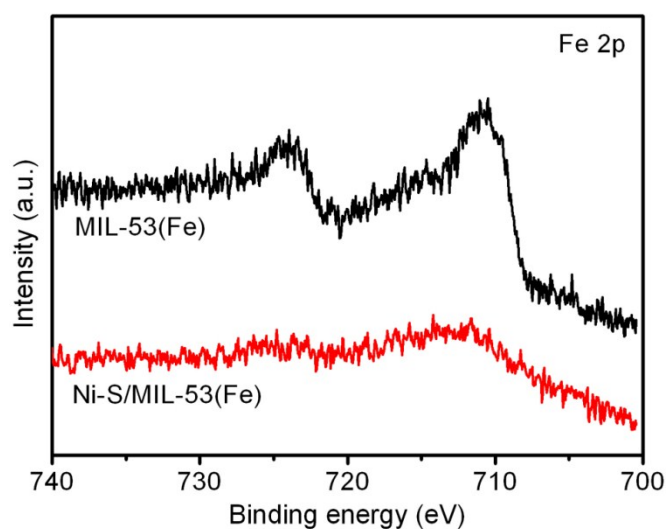

**Figure S5.** XPS spectra of Fe 2p for MIL-53(Fe) and Ni-S/MIL-53(Fe).

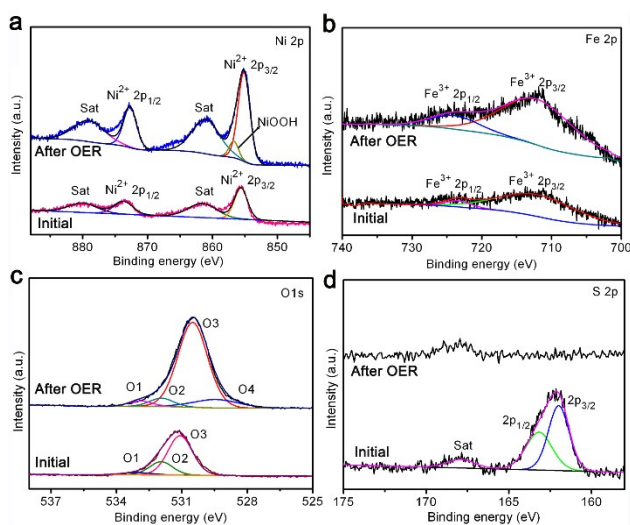

**Figure S6.** High resolution XPS spectra for the (a) Ni 2p, (b) Fe 2p, (c) O 1s and (d) S 2p regions of Ni-S/MIL-53(Fe) before and after 40 h of stability test.

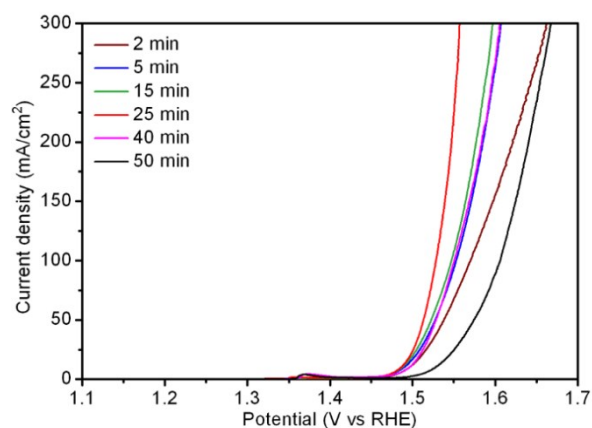

**Figure S7.** Polarization curves of Ni-S/MIL-53(Fe) with various deposition time in 1 M KOH.

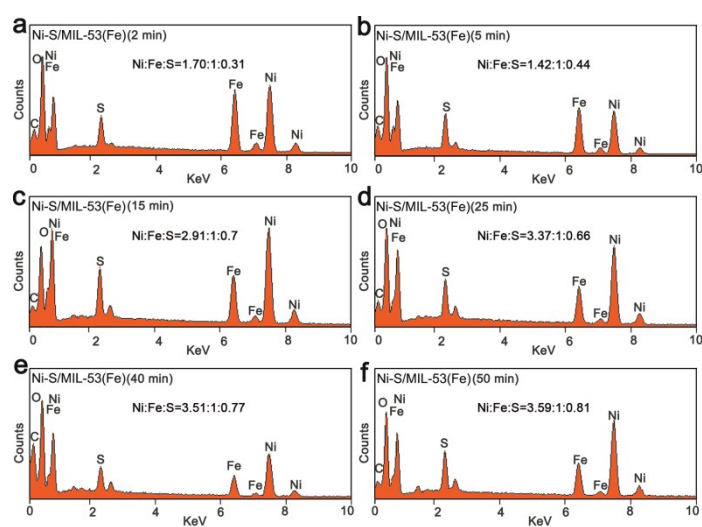

**Figure S8.** SEM-EDX spectra of Ni-S/MIL-53(Fe) with different electrodeposition time of (a) 2, (b) 5, (c) 15, (d) 25, (e) 40 and (f) 50 min, respectively.

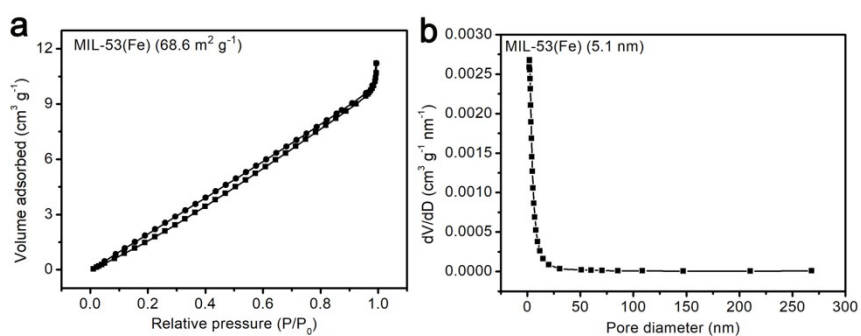

**Figure S9.** (a)  $N_2$  adsorption/desorption isotherms, and (b) pore size distribution curve of MIL-53(Fe) electrode.

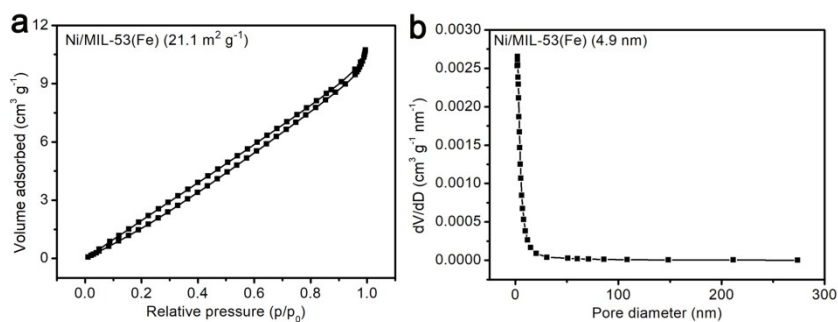

**Figure S10.** (a)  $N_2$  adsorption/desorption isotherms, and (b) pore size distribution curve of Ni/MIL-53(Fe) electrode.

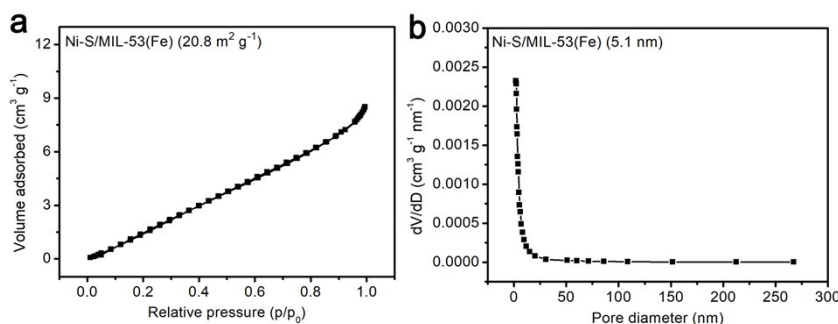

**Figure S11.** (a)  $N_2$  adsorption/desorption isotherms, and (b) pore size distribution curve of Ni-S/MIL-53(Fe) electrode.

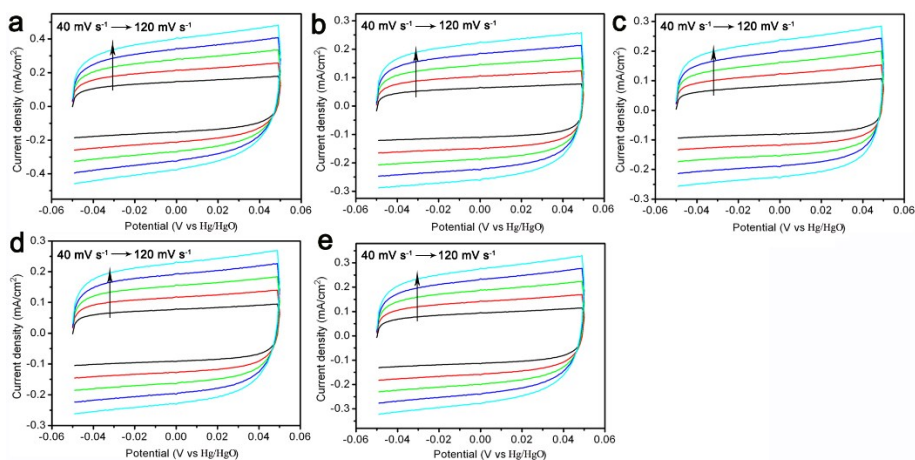

**Figure S12.** CVs of (a) Ni-S/MIL-53(Fe), (b) Ni/MIL-53(Fe), (c) MIL-53(Fe), (d) Ni-S/NF and (e) Ni/NF in the region of -0.05-0.05 V vs Hg/HgO at scan rates of 40, 60, 80, 100 and 120  $mV s^{-1}$ .

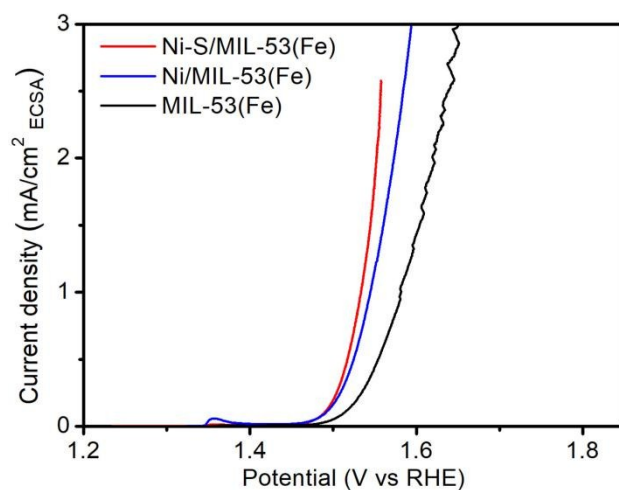

**Figure S13.** The OER activity of MIL-53(Fe), Ni/MIL-53(Fe) and Ni-S/MIL-53(Fe) after the electrochemical surface area normalization.

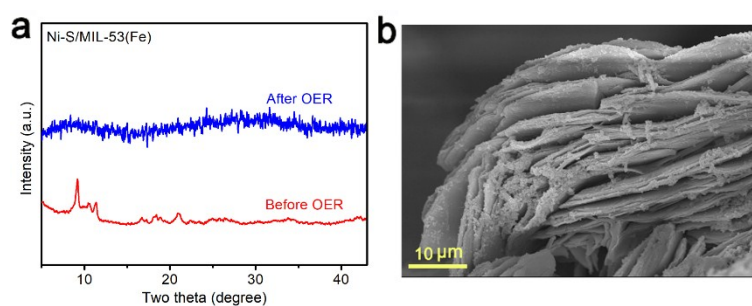

**Figure S14.** (a) XRD pattern and (b) SEM image of Ni-S/MIL-53(Fe) after 40 h of stability test.

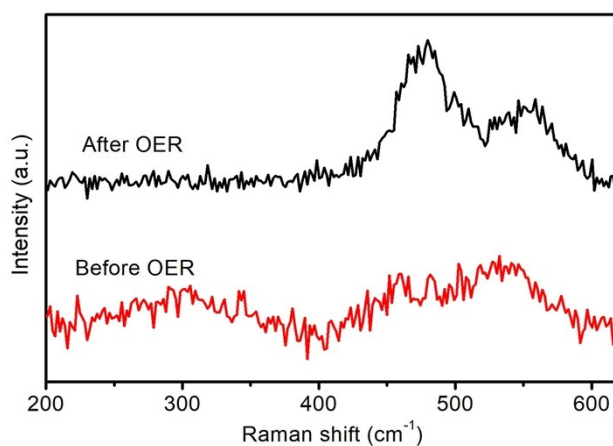

**Figure S15.** Raman spectra of Ni-S/MIL-53(Fe) before and after 40 h of stability test.
